# Supplementary material
Source: MDPI journal article supplement (https://www.mdpi.com/1999-4907/8/2/40)
Supplement: s1 [file s1]

Supplementary Information

Temporal Variability of Soil Respiration in Experimental Tree Plantations in Lowland Costa Rica: Supplementary Information

James W. Raich

Department of Ecology, Evolution & Organismal Biology, Iowa State University, Ames, IA 50011, USA; jraich@iastate.edu; Tel.: +1-515-294-5073

Academic Editors: Robert Jandl and Mirco Rodeghiero

Received: 10 January 2017; Accepted: 2 February 2017; Published: date

**Table S1.** Summary of diel measurements included in this study. Values for *Rsoil* are the mean fluxes observed over the duration of the measurement period. Soil water was measured at the beginning and the end of the measurement period; shown below are the means of those two measurement times.

| **Date Began** | **Species**  **Code1** | **Block** | **Duration** | ***Rsoil***  **(μmol m−2·sec−1)** | **Soil H2O**  **(% volume)** | ***Rsoil* CV**  **(%)** |
| --- | --- | --- | --- | --- | --- | --- |
| 2004-11-12 | HIAL | 1 | 51 | 3.4 | 54.2 | 11 |
| 2004-11-16 | VIKO | 1 | 40 | 2.6 | 61.9 | 15 |
| 2004-11-19 | VOGU | 1 | 70 | 5.5 | 50.7 | 15 |
| 2008-01-22 | VOGU | 4 | 53 | 5.1 | 43.5 | 9 |
| 2008-01-24 | PIPA | 4 | 52 | 3.5 | 35.1 | 6 |
| 2008-02-01 | VIKO | 4 | 56 | 4.1 | 54.1 | 8 |
| 2008-02-04 | PEMA | 4 | 50 | 4.1 | 27.3 | 7 |
| 2008-02-06 | HIAL | 4 | 51 | 4.1 | 24.3 | 34 |
| 2008-02-08 | PEMA | 3 | 56 | 2.8 | 28.0 | 9 |
| 2008-02-11 | HIAL | 3 | 51 | 6.3 | 30.9 | 9 |
| 2008-02-15 | PIPA | 3 | 56 | 3.8 | 49.4 | 7 |
| 2008-02-18 | VOGU | 3 | 51 | 4.8 | 31.6 | 9 |
| 2008-02-22 | VIKO | 3 | 56 | 5.4 | 35.9 | 8 |
| 2008-02-25 | HIAL | 1 | 51 | 4.0 | 47.1 | 16 |
| 2008-02-29 | VIKO | 1 | 56 | 3.3 | 38.4 | 10 |
| 2008-03-03 | VOFE | 3 | 51 | 3.2 | 19.9 | 8 |
| 2008-03-05 | VOFE | 4 | 51 | 6.9 | 25.4 | 12 |
| 2008-03-07 | VOGU | 1 | 56 | 4.4 | 25.0 | 14 |
| 2008-03-14 | VOFE | 1 | 56 | 4.1 | 21.3 | 14 |
| 2008-03-24 | PIPA | 1 | 51 | 4.6 | 30.1 | 13 |
| 2008-03-27 | PEMA | 1 | 56 | 4.4 | 29.1 | 9 |
| 2008-03-31 | PIPA | 2 | 51 | 2.8 | 33.5 | 10 |
| 2008-04-04 | VOGU | 2 | 56 | 4.8 | 20.5 | 13 |
| 2008-04-07 | VOFE | 2 | 51 | 6.0 | 20.8 | 11 |
| 2008-04-11 | HIAL | 2 | 56 | 4.4 | 19.8 | 32 |
| 2008-04-16 | VIKO | 2 | 51 | 2.4 | 34.1 | 10 |
| 2008-04-18 | PEMA | 2 | 39 | 2.8 | 36.3 | 11 |
| 2009-10-30 | VIKO | 1 | 51 | 3.3 | 61.5 | 25 |
| 2009-11-02 | HIAL | 1 | 50 | 3.7 | 58.9 | 26 |
| 2009-11-04 | VOGU | 1 | 51 | 6.3 | 44.4 | 20 |
| 2009-11-06 | VOFE | 1 | 53 | 6.7 | 47.5 | 28 |
| 2009-11-09 | PIPA | 1 | 51 | 3.9 | 47.5 | 24 |
| 2009-11-13 | PEMA | 1 | 53 | 3.4 | 56.6 | 39 |
| 2009-11-20 | PIPA | 2 | 53 | 5.6 | 56.1 | 45 |
| 2009-11-23 | VOGU | 2 | 51 | 6.7 | 61.3 | 34 |
| 2009-11-27 | VOFE | 2 | 51 | 4.9 | 52.1 | 12 |
| 2009-11-30 | HIAL | 2 | 49 | 5.0 | 45.6 | 24 |
| 2009-12-02 | VIKO | 2 | 51 | 5.1 | 47.0 | 18 |
| 2009-12-04 | PEMA | 2 | 50 | 3.4 | 48.9 | 33 |
| 2009-12-11 | HIAL | 3 | 51 | 4.8 | 53.8 | 17 |
| 2009-12-14 | PIPA | 3 | 51 | 4.4 | 47.9 | 16 |
| 2009-12-16 | VOFE | 3 | 51 | 6.6 | 49.4 | 31 |
| 2009-12-18 | PEMA | 3 | 51 | 5.2 | 46.3 | 31 |
| 2010-01-06 | VOGU | 4 | 52 | 4.4 | 57.4 | 39 |
| 2010-01-08 | VIKO | 4 | 51 | 3.0 | 66.5 | 33 |
| 2010-01-15 | VIKO | 3 | 51 | 5.3 | 51.3 | 9 |
| 2010-01-18 | VOGU | 3 | 51 | 3.6 | 44.0 | 23 |
| 2010-01-22 | HIAL | 4 | 53 | 4.7 | 19.4 | 13 |
| 2010-01-25 | PEMA | 4 | 51 | 4.0 | 30.3 | 17 |
| 2010-01-27 | VOFE | 4 | 51 | 4.1 | 21.0 | 16 |
| 2010-01-29 | PIPA | 4 | 51 | 2.7 | 48.5 | 15 |
| 2010-02-05 | VOGU | 4 | 52 | 5.4 | 39.0 | 30 |

1 HIAL = Hieronyma alchorneoides, PEMA = Pentaclethra macroloba, PIPA = Pinus patula, VIKO = Virola koschnyi, VOFE = Vochysia ferruginea, VOGU = Vochysia guatemalensis.

**Table S2.** Summary of across-site survey measurements included in this study. All four blocks included each of the 66 measurement periods, here identified by the beginning date. Soil water content and soil temperature (*Tsoil*) are site-wide averages (*N* = 4 plots per species). CV (final column) is the coefficient of variation of *Rsoil* (μmol m−2·sec−1) for that measurement period; it describes the spatial flux variability encountered.

| **Date Began** | **Species 1** | **Chambers**  **per Plot** | **Total #**  **of Plots** | **Soil H2O 4**  **(% Volume)** | ***Tsoil***  **(°C)** | ***Rsoil* CV**  **(%)** |
| --- | --- | --- | --- | --- | --- | --- |
| 2004-09-29 3 | all six | 3 | 24 | 36.9 | 25.4 | 37 |
| 2004-10-12 2,3 | all six | 3 | 24 | 52.9 | 25.7 | 41 |
| 2004-10-26 2,3 | all six | 3 | 24 | 54.3 | 24.8 | 43 |
| 2004-11-11 2,3 | all six | 3 | 24 | 53.3 | 24.5 | 48 |
| 2004-11-30 2,3 | all six | 3 | 24 | 51.9 | 24.8 | 37 |
| 2005-03-20 2,3 | all six | 3 | 24 | 31.7 | 25.5 | 45 |
| 2005-05-06 2,3 | all six | 3 | 24 | no data | 26.0 | 49 |
| 2005-05-16 2,3 | all six | 3 | 24 | 40.1 | 26.1 | 49 |
| 2005-06-01 2,3 | all six | 3 | 24 | no data | 26.5 | 44 |
| 2005-06-20 2,3 | all six | 3 | 24 | 36.2 | 26.6 | 43 |
| 2005-07-11 2,3 | all six | 3 | 24 | 33.4 | 26.4 | 40 |
| 2005-08-01 2,3 | all six | 3 | 24 | no data | 25.5 | 41 |
| 2005-11-24 3 | all six | 3 | 24 | 60.9 | 25.3 | 35 |
| 2005-12-15 3 | all six | 3 | 24 | no data | no data | 34 |
| 2005-12-27 3 | all six | 3 | 24 | 59.2 | 23.3 | 116 |
| 2006-01-18 3 | all six | 3 | 24 | 58.1 | 24.0 | 37 |
| 2006-02-01 3 | all six | 3 | 24 | 56.0 | 24.3 | 32 |
| 2006-02-15 3 | all six | 3 | 24 | 59.4 | 22.9 | 104 |
| 2006-02-24 3 | all six | 3 | 24 | 60.6 | 23.9 | 45 |
| 2006-03-143 | all six | 3 | 24 | 48.0 | 24.2 | 36 |
| 2006-04-19 3 | all six | 3 | 24 | 39.9 | 24.7 | 28 |
| 2006-05-03 3 | all six | 3 | 24 | 40.8 | 24.5 | 28 |
| 2006-05-16 3 | all six | 3 | 24 | 40.4 | 25.7 | 33 |
| 2006-05-30 3 | all six | 3 | 24 | 46.5 | 25.0 | 29 |
| 2006-06-14 3 | no VOFE | 3-4 | 70 | 42.4 | 25.4 | 30 |
| 2006-07-05 3 | no VOFE | 3-4 | 70 | 54.4 | 25.1 | 36 |
| 2006-07-20 3 | no VOFE | 3-4 | 70 | 58.5 | 25.5 | 37 |
| 2006-08-03 3 | no VOFE | 3-4 | 70 | 49.8 | 26.2 | 42 |
| 2006-08-16 3 | no VOFE | 3-4 | 70 | 56.4 | 25.8 | 38 |
| 2006-08-30 3 | no VOFE | 3-4 | 70 | 55.8 | 26.5 | 47 |
| 2007-10-17 | no PIPA or VOFE | 4 | 64 | 47.7 | 25.4 | 35 |
| 2007-10-30 | no PIPA or VOFE | 4 | 64 | 49.6 | 24.8 | 38 |
| 2007-11-13 | no PIPA or VOFE | 4 | 64 | 52.3 | 23.9 | 33 |
| 2007-12-04 | no PIPA or VOFE | 4 | 64 | 46.3 | 24.0 | 31 |
| 2007-12-21 | no VOFE | 4 | 80 | 55.6 | 23.8 | 36 |
| 2008-01-17 | no VOFE | 4 | 80 | 45.8 | 23.6 | 40 |
| 2008-01-31 | no VOFE | 4 | 80 | 38.7 | 23.4 | 30 |
| 2008-02-21 | no VOFE | 4 | 80 | 38.99 | 23.5 | 27 |
| 2008-03-13 | no VOFE | 4 | 80 | 23.9 | 23.4 | 32 |
| 2008-04-03 | no PIPA or VOFE | 5 | 80 | 21.9 | 24.3 | 25 |
| 2008-04-24 | no PIPA or VOFE | 5 | 80 | 28.8 | 24.9 | 28 |
| 2008-05-14 | no PIPA or VOFE | 5 | 80 | 21.5 | 25.7 | 30 |
| 2008-06-05 | no PIPA or VOFE | 5 | 80 | 39.2 | 25.0 | 31 |
| 2008-06-25 | no PIPA or VOFE | 5 | 80 | 42.8 | 24.7 | 35 |
| 2008-07-16 | no PIPA or VOFE | 5 | 80 | 36.8 | 24.6 | 30 |
| 2008-08-01 | no PIPA or VOFE | 5 | 80 | 45.8 | 24.9 | 36 |
| 2008-08-21 | no PIPA or VOFE | 5 | 80 | 34.4 | 25.2 | 34 |
| 2008-09-19 | no PIPA or VOFE | 5 | 80 | 36.7 | 25.6 | 32 |
| 2008-10-03 | no PIPA or VOFE | 5 | 80 | 47.0 | 25.2 | 35 |
| 2009-02-11 | no PIPA, no VOFE | 5 | 80 | 50.6 | 22.9 5 | 35 |
| 2009-03-11 | no PIPA, no VOFE | 5 | 80 | 52.3 | 22.5 5 | 39 |
| 2009-03-24 | no PIPA, no VOFE | 5 | 80 | 32.2 | 23.2 5 | 28 |
| 2009-04-14 | no PIPA, no VOFE | 5 | 80 | 23.6 | 24.7 5 | 28 |
| 2009-05-05 | no PIPA or VOFE | 5 | 80 | 25.5 | 24.8 5 | 24 |
| 2009-05-26 | no PIPA or VOFE | 5 | 80 | 36.5 | 25.6 5 | 31 |
| 2009-06-18 | no PIPA, no VOFE | 5 | 80 | 39.2 | 25.4 5 | 30 |
| 2009-07-07 | no PIPA, no VOFE | 5 | 80 | 43.3 | 25.2 5 | 29 |
| 2009-07-28 | no PIPA, no VOFE | 5 | 80 | 47.5 | 25.5 5 | 30 |
| 2009-08-18 | no PIPA, no VOFE | 5 | 80 | 42.5 | 25.5 5 | 28 |
| 2009-09-08 | no PIPA, no VOFE | 5 | 80 | 42.5 | 26.1 5 | 29 |
| 2009-10-27 | no PIPA, no VOFE | 5 | 80 | 46.6 | 25.3 5 | 34 |
| 2009-11-18 | no PIPA, no VOFE | 5 | 80 | 51.5 | 24.3 5 | 29 |
| 2009-12-08 | no PIPA, no VOFE | 5 | 80 | 44.5 | 24.4 5 | 26 |
| 2009-12-22 | no PIPA, no VOFE | 5 | 80 | 45.4 | 23.5 5 | 25 |
| 2010-01-13 | no PIPA, no VOFE | 5 | 80 | 57.7 | 21.6 5 | 30 |
| 2010-02-24 | no PIPA, no VOFE | 5 | 80 | 42.8 | 25.1 5 | 28 |

1 The six plantation types were HIAL = Hieronyma alchorneoides, PEMA = Pentaclethra macroloba, PIPA = Pinus patula, VIKO = Virola koschnyi, VOFE = Vochysia ferruginea, VOGU = Vochysia guatemalensis; 2 Included in [65]; 3 Included in [53]; 4 Units are cm H2O cm−1 soil depth, expressed as a percent; 5 At 10 cm depth in soil; earlier measurements were at 5 cm depth

**Table S3.** Annual climate data for the study site during this study, in comparison to 1999 through 2015 averages. Data are courtesy of the La Selva Biological Station.

| **Year(s)** | **Mean Daily Temperature**  **(°C)** | **Annual Rainfall**  **(mm)** | **Jan–Apr 1**  **Rainfall**  **(mm)** |
| --- | --- | --- | --- |
| 1999–2015 mean | 25.1 | 4531 | 1012 |
| 2004 | 25.5 | 5914 | 1235 |
| 2005 | 25.1 | 4224 | 1215 |
| 2006 | 25.1 | 4532 | 1294 |
| 2007 | 25.0 | 4077 | 830 |
| 2008 | 25.0 | 4192 | 743 |
| 2009 | 25.1 | 4454 | 1350 |
| 2010 | 25.2 | 4743 | 1415 |
| 2004–2010 mean | 25.1 | 4422 | 1171 |

1 The dry season.

**Table S4.** Average soil respiration (*Rsoil*) differed among months within species but in parallel among species. Values herein are across-year means ± S.E. Annual totals are derived from the monthly means weighted by the number of days per month.

| **Month** | **Soil Respiration (μmol m−2·sec−1)** | | | | | |
| --- | --- | --- | --- | --- | --- | --- |
|  | HIAL.1 | PEMA.1 | PIPA.1 | VIKO.1 | VOFE.1 | VOGU.1 |
| January | 3.83 ± 0.21 | 3.46 ± 0.21 | 3.31 ± 0.27 | 3.37 ± 0.17 | 3.68 ± 0.29 | 4.51 ± 0.24 |
| February | 4.10 ± 0.17 | 3.76 ± 0.17 | 2.91 ± 0.17 | 3.64 ± 0.19 | 3.93 ± 0.22 | 4.69 ± 0.16 |
| March | 4.89 ± 0.20 | 4.06 ± 0.22 | 3.75 ± 0.28 | 4.03 ± 0.15 | 5.46 ± 0.59 | 5.09 ± 0.22 |
| April | 4.77 ± 0.22 | 4.09 ± 0.19 | 4.59 ± 0.38 | 4.16 ± 0.13 | 5.95 ± 0.58 | 5.08 ± 0.21 |
| May | 5.08 ± 0.18 | 4.51 ± 0.16 | 3.98 ± 0.18 | 4.48 ± 0.15 | 5.80 ± 0.38 | 5.42 ± 0.16 |
| June | 5.07 ± 0.20 | 4.34 ± 0.22 | 3.81 ± 0.22 | 4.20 ± 0.21 | 5.36 ± 0.59 | 5.58 ± 0149 |
| July | 4.94 ± 0.20 | 4.05 ± 0.16 | 3.32 ± 0.14 | 3.93 ± 0.18 | 4.83 ± 0.82 | 5.07 ± 0.20 |
| August | 4.79 ± 0.24 | 4.25 ± 0.19 | 3.42 ± 0.15 | 3.89 ± 0.17 | 6.59 ± 0.97 | 5.21 ± 0.26 |
| September | 6.37 ± 0.33 | 5.07 ± 0.30 | 6.02 ± 0.81 | 4.91 ± 0.23 | 6.52 ± 0.90 | 6.47 ± 0.34 |
| October | 5.54 ± 0.23 | 4.33 ± 0.22 | 4.18 ± 0.39 | 4.28 ± 0.19 | 5.92 ± 0.57 | 5.93 ± 0.26 |
| November | 4.70 ± 0.21 | 3.71 ± 0.23 | 3.17 ± 0.20 | 3.79 ± 0.17 | 4.80 ± 0.50 | 4.89 ± 0.18 |
| December | 4.85 ± 0.18 | 4.10 ± 0.17 | 3.23 ± 0.18 | 4.21 ± 0.19 | 4.21 ± 0.23 | 5.18 ± 0.16 |
| Annual (gC·m−2) | 1862 | 1571 | 1443 | 1544 | 1994 | 1994 |

1 The six plantation types were: HIAL = Hieronyma alchorneoides, PEMA = Pentaclethra macroloba, PIPA = Pinus patula, VIKO = Virola koschnyi, VOFE = Vochysia ferruginea, VOGU = Vochysia guatemalensis

**Table S5.** Statistical relationships between observed *Rsoil* (μmol m−2·sec−1) and soil water content (SoilH2O, cm H2O m−1 soil) based on data from the across-site survey study. A quadratic relationship of the form [ln(*Rsoil*) = param1 + param2 × Soil H2O + (param3 × (SoilH2O − meanSoilH2O)2] gave a better fit than did a linear fit, except in one case. All parameters included in the table are significant. The *P*(model) refers to the probability of significance of that model.

| **Tree Species** | ***P*(param1)** | ***P*(param2)** | ***P*(param3)** | **Mean(SoilH2O)**  **(cm m−1)** | ***N*** | ***P*(model)** |
| --- | --- | --- | --- | --- | --- | --- |
| *Hieronyma* | 2.03 | −0.00839 | −0.000456 | 43.6 | 972 | 0.0001 |
| *Pentaclethra* | 2.01 | −0.0129 | −0.000519 | 40.7 | 972 | 0.0001 |
| *Pinus patula* | 1.94 | −0.0131 | −0.000208 | 49.1 | 377 | 0.0001 |
| *Virola koschnyi* | 1.96 | −0.0106 | −0.000395 | 46.4 | 974 | 0.0001 |
| *V. ferruginea* | 2.45 | −0.0168 |  | 47.2 | 211 | 0.0001 |
| *V. guatemalensis* | 2.10 | −0.00878 | −0.0000497 | 43.1 | 980 | 0.0001 |

**Table S6**. Linear relationships between observed *Rsoil* (μmol m−2·sec−1) and soil temperature at 5 cm depth (°C). The model tested was [ln(*Rsoil*) = intercept + slope × *Tsoil*]. *P* refers to the probability of significance.

| **Tree Species** | ***Intercept*** | ***Slope*** | ***N*** | ***P*(model)** |
| --- | --- | --- | --- | --- |
| *Hieronyma* | 0.318 | 0.0486 | 664 | 0.001 |
| *Pentaclethra* | 0.342 | 0.0426 | 670 | 0.005 |
| *Pinus patula* | - | - | - | n.s. |
| *Virola koschnyi* | 1.96 | −0.0236 | 669 | [0.073] |
| *V. ferruginea* | −1.53 | 0.127 | 250 | 0.0001 |
| *V. guatemalensis* | 0.217 | 0.0579 | 669 | 0.0001 |

n.s. indicates not significant

**Table S7.** Mean monthly litterfall across 24 monodominant plantations of six tree species in the Atlantic lowlands of Costa Rica, from October 2003 to January 2010. Twigs were ≤1 cm in diameter; larger branches were excluded. Not all species were measured over the duration of the study. Values shown here are averages of the monthly means of the six plantation types (*N* = 6).

| **Month** | **Total Fine**  **Litterfall**  **(g·m**−**2·day**−**1)** | **Canopy**  **Leaf Fall**  **(g·m**−**2·day**−**1)** | **Total Leaf**  **Fall**  **(g·m**−**2·day**−**1)** | **Twig**  **Litterfall**  **(g·m**−**2·day**−**1)** |
| --- | --- | --- | --- | --- |
| January | 2.52 ± 0.20 | 1.41 ± 0.10 | 1.90 ± 0.09 | 0.41 ± 0.08 |
| February | 2.73± 0.16 | 1.61 ± 0.12 | 2.25 ± 0.11 | 0.37 ± 0.05 |
| March | 3.41 ± 0.35 | 2.01 ± 0.27 | 2.87 ± 0.24 | 0.44 ± 0.06 |
| April | 2.30 ± 0.17 | 1.24 ± 0.13 | 1.96 ± 0.11 | 0.21 ± 0.03 |
| May | 2.80± 0.29 | 1.24 ± 0.10 | 1.95 ± 0.10 | 0.51 ± 0.07 |
| June | 2.84 ± 0.24 | 1.27 ± 0.11 | 1.97 ± 0.16 | 0.52 ± 0.06 |
| July | 2.55 ± 0.05 | 1.29 ± 0.12 | 1.95 ± 0.08 | 0.34 ± 0.02 |
| August | 2.52 ± 0.14 | 1.21 ± 0.11 | 1.92 ± 0.08 | 0.47 ± 0.06 |
| September | 2.88 ± 0.17 | 1.60 ± 0.17 | 2.38 ± 0.10 | 0.36 ± 0.07 |
| October | 3.11 ± 0.18 | 1.78 ± 0.18 | 2.58 ± 0.12 | 0.38 ± 0.05 |
| November | 2.33 ± 0.19 | 1.34 ± 0.16 | 1.97 ± 0.12 | 0.19 ± 0.01 |
| December | 2.05 ± 0.15 | 1.02 ± 0.09 | 1.53 ± 0.07 | 0.31 ± 0.05 |
| Annual  (g·m−2·year−1) | 975 | 553 | 768 | 137 |

© 2016 by the authors; licensee MDPI, Basel, Switzerland. This article is an open access article distributed under the terms and conditions of the Creative Commons by Attribution (CC-BY) license (http://creativecommons.org/licenses/by/4.0/).
